# Supplementary material for: Structure diversities of ten entangled coordination polymers assembled from reactions of Co(ii) or Ni(ii) salts with 5-(pyridin-4-yl)isophthalic acid in the absence or presence of auxiliary N-donor ligands
Source: Royal Society of Chemistry journal article supplement (doi:10.1039/c3ce41059e), 2013-01-01
Supplement: c3ce41059e.pdf [file c3ce41059e.pdf]

## **Electronic Supplementary Information (ESI)**

**Structure diversities of ten entangled coordination polymers assembled from reactions of Co(II) or Ni(II) salts with 5-(pyridin-4-yl)isophthalic acid in the absence or presence of auxiliary N-donor ligands**

**Fei-Long Hu,<sup>ab</sup> Mi Yan,<sup>b</sup> Yun-Qiong Gu,<sup>b</sup> Li-Gang Zhu,<sup>b</sup> Sheng-Lan Yang,<sup>b</sup> Han Wei,<sup>b</sup> and Jian-Ping Lang<sup>\*a</sup>**

<sup>a</sup> College of Chemistry, Chemical Engineering and Materials Science, Soochow University, Suzhou 215123, Jiangsu, P. R. China.

<sup>b</sup> College of Chemistry and Material, Yulin Normal University, Yulin 537000, P. R. China

## Table of Contents

|                                                                                                                                                                                                                                                                                                                                                                                                              |    |
|--------------------------------------------------------------------------------------------------------------------------------------------------------------------------------------------------------------------------------------------------------------------------------------------------------------------------------------------------------------------------------------------------------------|----|
| <b>Fig. S1.</b> (a) The 4-fold interpenetrating structure of <b>10</b> . (b) The pillar which formed by the short and/or long pillars. ....                                                                                                                                                                                                                                                                  | S3 |
| <b>Fig. S2.</b> PXRD patterns for <b>1-4</b> . (a) simulated (black) and single-phase polycrystalline sample (red) of <b>1</b> . (b) simulated (black) and single-phase polycrystalline sample (red) of <b>2</b> . (c) simulated (black) and single-phase polycrystalline sample (red) of <b>3</b> . (d) simulated (black) and single-phase polycrystalline sample (red) of <b>4</b> . ....                  | S3 |
| <b>Fig. S3.</b> PXRD patterns for <b>5-8</b> . (a) simulated (black) and single-phase polycrystalline sample (red) of <b>5</b> . (b) simulated (black) and single-phase polycrystalline sample (red) of <b>6</b> . (c) simulated (black) and single-phase polycrystalline sample (red) of <b>7</b> . (d) simulated (black) and single-phase polycrystalline sample (red) of <b>8</b> . ....                  | S4 |
| <b>Fig. S4.</b> PXRD patterns for <b>8-10</b> . (a) simulated (black) and single-phase polycrystalline sample (red) of <b>9</b> . (b) simulated (black) and single-phase polycrystalline sample (red) of <b>10</b> . ....                                                                                                                                                                                    | S4 |
| <b>Fig. S5.</b> The TGA curves for compounds <b>1-3</b> . ....                                                                                                                                                                                                                                                                                                                                               | S5 |
| <b>Fig. S6.</b> The TGA curves for compounds <b>4-7</b> . ....                                                                                                                                                                                                                                                                                                                                               | S5 |
| <b>Fig. S7.</b> The TGA curves for compounds <b>8-10</b> . ....                                                                                                                                                                                                                                                                                                                                              | S6 |
| <b>Magnetic properties</b> .....                                                                                                                                                                                                                                                                                                                                                                             | S7 |
| <b>Fig. S8.</b> (a) $\chi_m T$ vs. T curve of <b>3</b> under 0.1 T applied field. (b) Field dependence of the magnetization of <b>3</b> at 2K. (c) Plot of $\chi^{-1}$ vs. T and the fit of Curie-Weiss law (red curve) of <b>3</b> . (d) Temperature dependence of magnetic susceptibilities in the forms of $\chi_m T$ at an applied field of 1 kOe and red solid line shows the best fit at 2–300 K. .... | S7 |

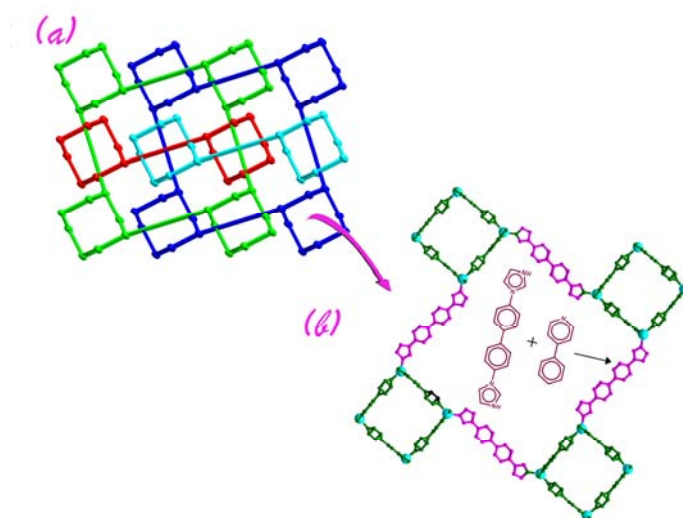

**Fig. S1.** (a) The 4-fold interpenetrating structure of **10**. (b) The pillar which formed by the short and/or long pillars.

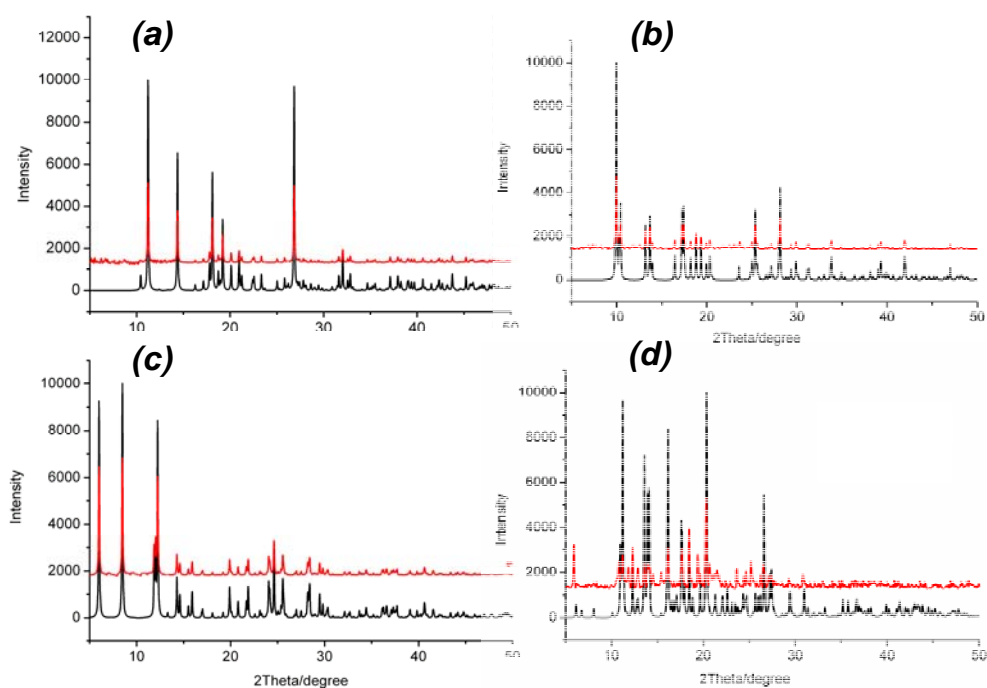

**Fig. S2.** PXRD patterns for **1-4**. (a) simulated (black) and single-phase polycrystalline sample (red) of **1**. (b) simulated (black) and single-phase polycrystalline sample (red) of **2**. (c) simulated (black) and single-phase polycrystalline sample (red) of **3**. (d) simulated (black) and single-phase polycrystalline sample (red) of **4**.

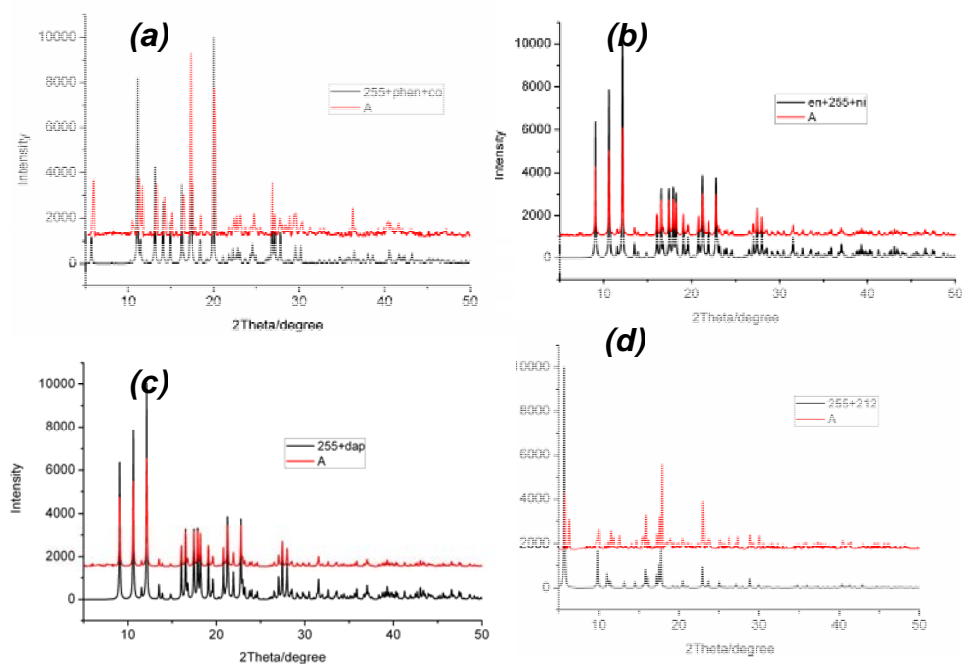

**Fig. S3.** PXRD patterns for **5-8**. (a) simulated (black) and single-phase polycrystalline sample (red) of **5**. (b) simulated (black) and single-phase polycrystalline sample (red) of **6**. (c) simulated (black) and single-phase polycrystalline sample (red) of **7**. (d) simulated (black) and single-phase polycrystalline sample (red) of **8**.

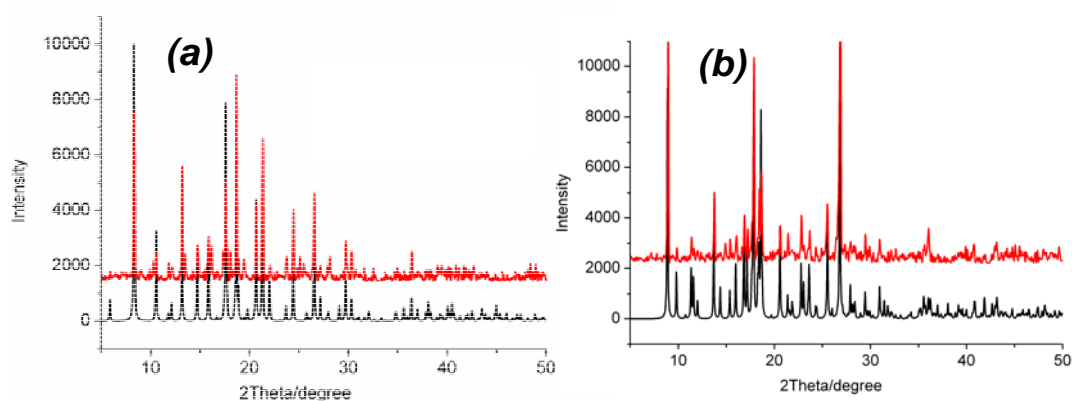

**Fig. S4.** PXRD patterns for **8-10**. (a) simulated (black) and single-phase polycrystalline sample (red) of **9**. (b) simulated (black) and single-phase polycrystalline sample (red) of **10**.

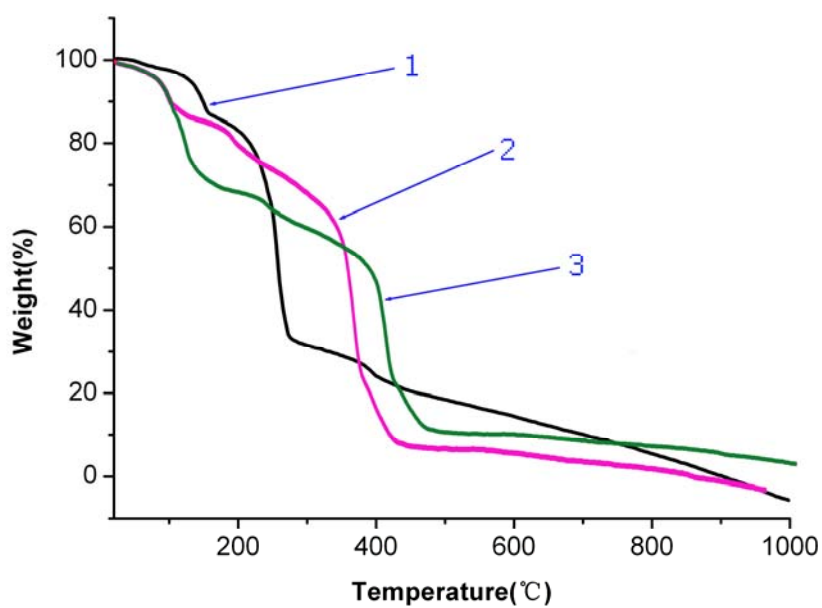

**Fig. S5.** The TGA curves for compounds 1-3.

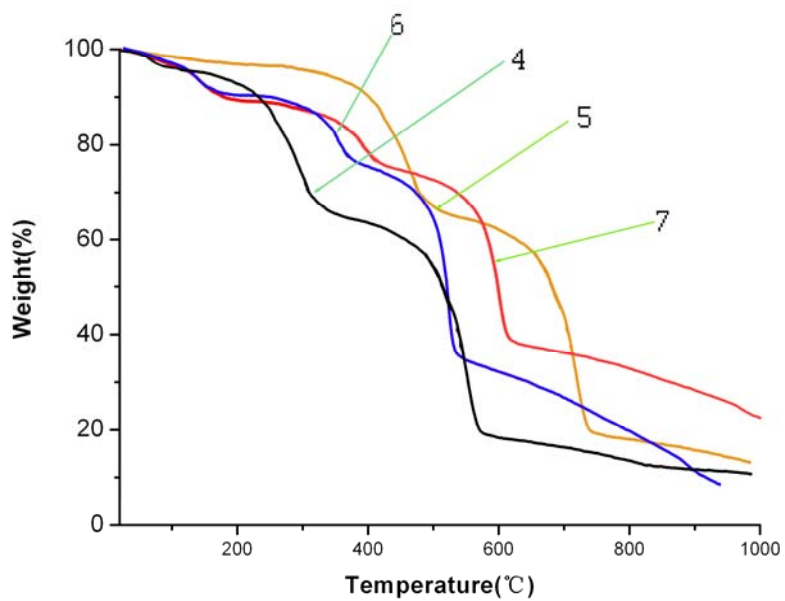

**Fig. S6.** The TGA curves for compounds 4-7.

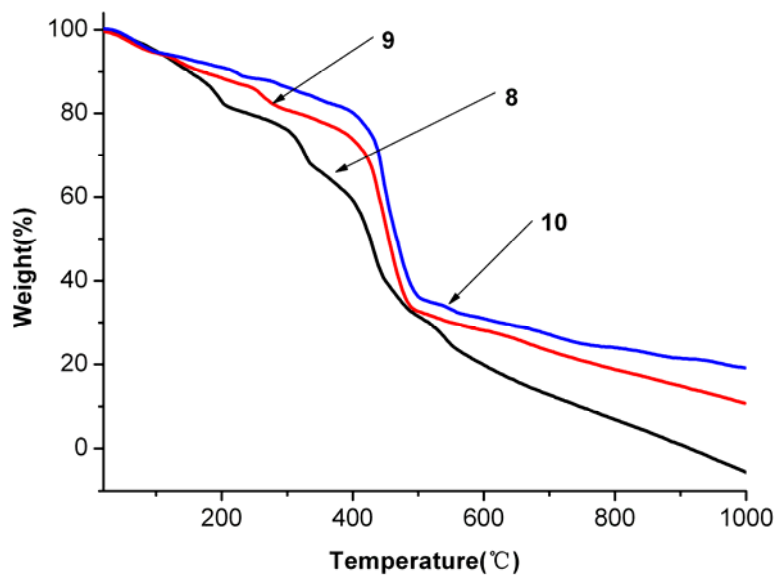

**Fig. S7.** The TGA curves for compounds **8-10**.

## Magnetic properties

In order to further study the magnetic interactions in **3**, the noncritical-scaling theory with the following simple phenomenological Eqn (1) was used to fit experimental data from 300 to 2K.

$$\chi_m T = A \exp(-E_1/kT) + B \exp(-E_2/kT) \quad (1)$$

Here, A+B equals the high-temperature Curie constant for Co(II) cluster unit, and  $E_1$  and  $E_2$  represent the activation energies corresponding to the spin-orbit coupling and antiferromagnetic exchange interactions, respectively. The best fit of the experimental data gives  $A + B = 9.1 \text{ cm}^3 \text{ K mol}^{-1}$ ,  $E_1/k = 86.5 \text{ K}$ ,  $E_2/k = 7.2 \text{ K}$ . These values indicate that dominant antiferromagnetic interactions between Co(II) ions exist in **3**.

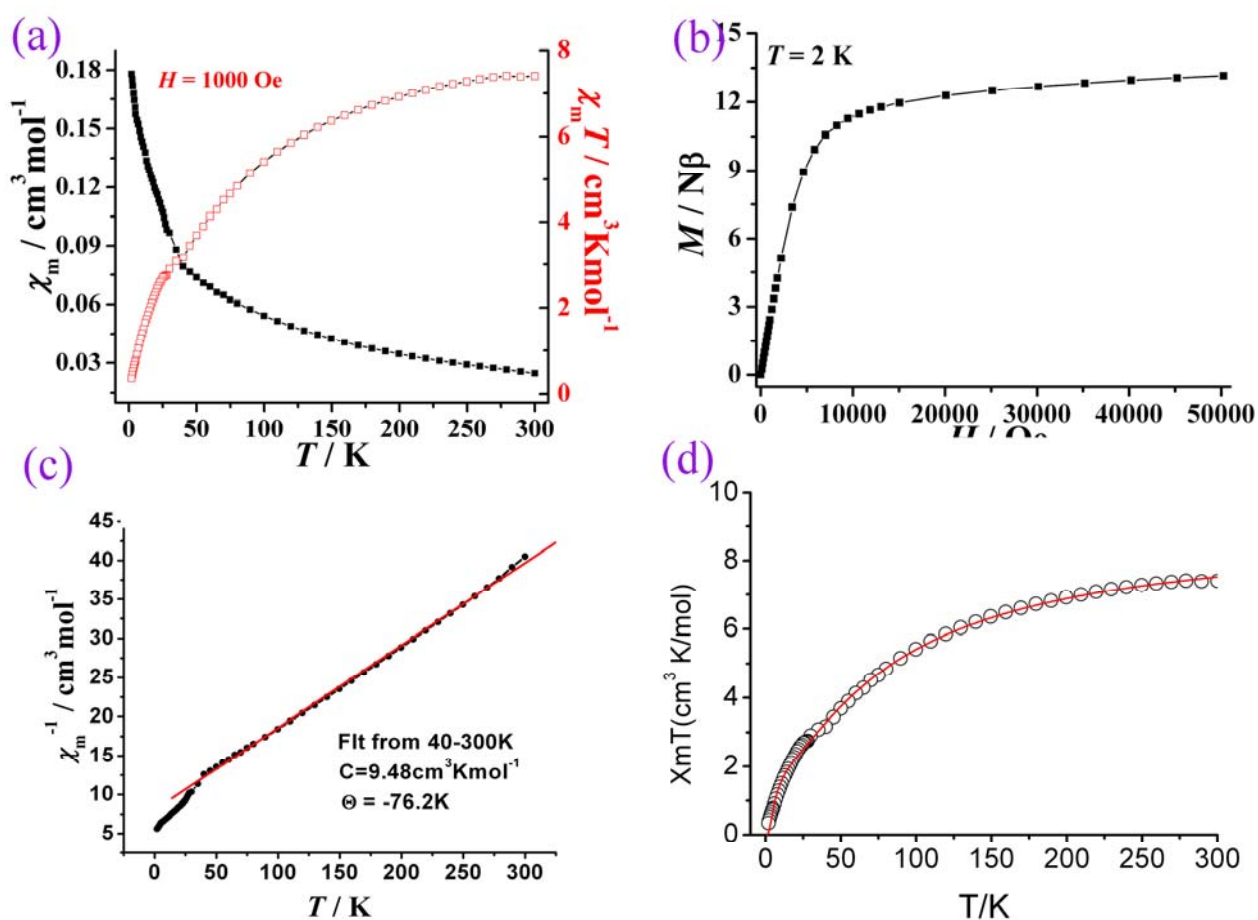

**Fig. S8.** (a)  $\chi_m T$  vs. T curve of **3** under 0.1 T applied field. (b) Field dependence of the magnetization of **3** at 2K. (c) Plot of  $\chi^{-1}$  vs. T and the fit of Curie-Weiss law (red curve) of **3**. (d) Temperature dependence of magnetic susceptibilities in the forms of  $\chi_m T$  at an applied field of 1 kOe and red solid line shows the best fit at 2–300 K.
